# Supplementary material for: Isolation and characterization of lumpy skin disease virus from cattle in India
Source: PubMed Central journal article supplement (PMC7799759; doi:10.1371/journal.pone.0241022), 2021-01-11
Supplement: pone.0241022.s003.pdf [file pone.0241022.s003.pdf]

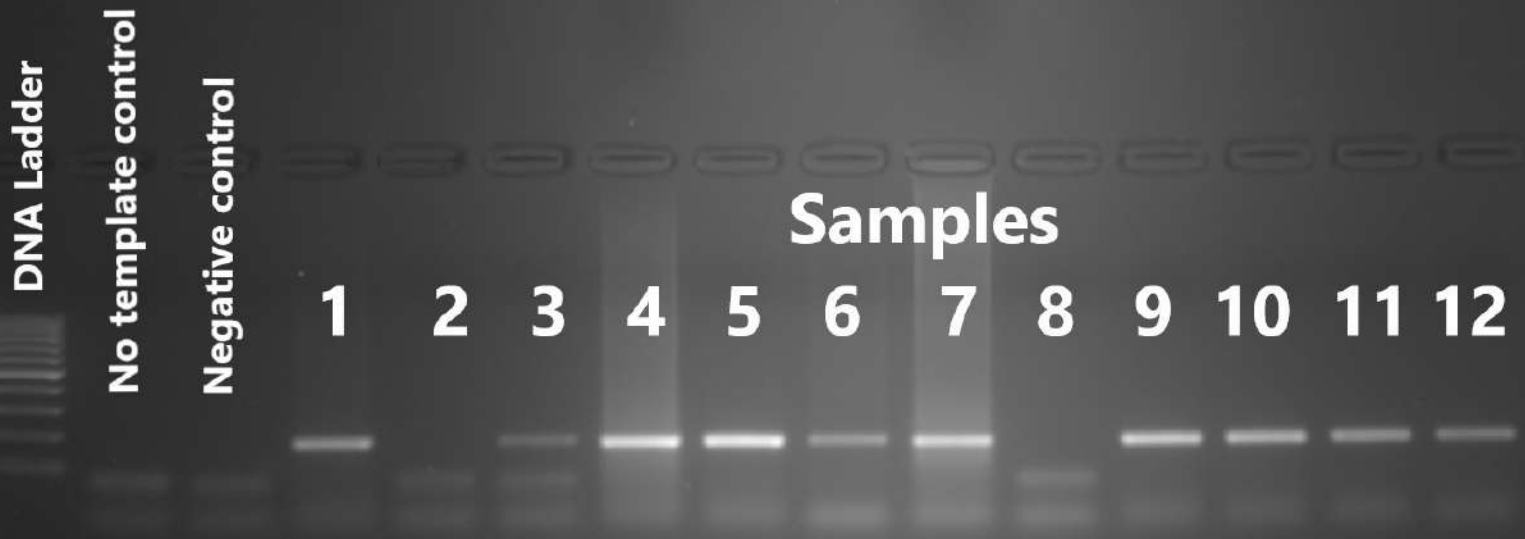

**S1 Fig\_Raw\_Image**
